# Supplementary material for: Effect of Time-Restricted Eating on Weight Loss in Adults With Type 2 Diabetes: A Randomized Clinical Trial
Source: PubMed Central journal article supplement — JAMA Netw Open. 2023 Oct 27;6(10):e2339337. doi: 10.1001/jamanetworkopen.2023.39337 (PMC10611992; doi:10.1001/jamanetworkopen.2023.39337), 2023-10-27
Supplement: jamanetwopen-e2339337-s002.pdf [file jamanetwopen-e2339337-s002.pdf]

## Supplementary Online Content

Pavlou V, Cienfuegos S, Lin S, et al. Efficacy of time-restricted eating in adults with type 2 diabetes: a randomized clinical trial. *JAMA Netw Open*. 2023;6(10):e2339337.  
doi:10.1001/jamanetworkopen.2023.39337

**eTable 1.** Medication Use at Baseline and Month 6

**eTable 2.** Multiple Imputation Sensitivity Analysis Results

**eTable 3.** Adverse Events During the Intervention

**eFigure 1.** Experimental Design

**eFigure 2.** Adherence to the Diet Interventions

**eFigure 3.** Difficulty in Adhering to the Time-Restricted Eating vs Calorie Restriction Intervention

This supplementary material has been provided by the authors to give readers additional information about their work.

**eTable 1.** Medication Use at Baseline and Month 6

|                                       | Time restricted eating |                     | Daily calorie restriction |                     | Control              |                     |
|---------------------------------------|------------------------|---------------------|---------------------------|---------------------|----------------------|---------------------|
|                                       | Baseline<br>(n = 25)   | Month 6<br>(n = 23) | Baseline<br>(n = 25)      | Month 6<br>(n = 22) | Baseline<br>(n = 25) | Month 6<br>(n = 24) |
| <b>Diabetes medications, no. (%)</b>  |                        |                     |                           |                     |                      |                     |
| <b>Oral hypoglycemic agents (OHA)</b> |                        |                     |                           |                     |                      |                     |
| Metformin                             | 21 (84%)               | 17 (74%)            | 19 (76%)                  | 16 (73%)            | 21 (84%)             | 20 (83%)            |
| DPP-4 Inhibitors                      | 0 (0%)                 | 1 (4%)              | 4 (16%)                   | 4 (18%)             | 1 (4%)               | 0 (0%)              |
| SGLT2 inhibitors                      | 9 (36%)                | 7 (30%)             | 1 (4%)                    | 2 (9%)              | 5 (20%)              | 5 (21%)             |
| GLP-1 agonists                        | 8 (32%)                | 8 (35%)             | 5 (20%)                   | 5 (23%)             | 6 (24%)              | 10 (42%)            |
| Sulfonylureas                         | 2 (8%)                 | 1 (4%)              | 7 (28%)                   | 6 (27%)             | 2 (8%)               | 2 (8%)              |
| <b>Insulin</b>                        | 13 (52%)               | 12 (52%)            | 4 (16%)                   | 4 (18%)             | 9 (36%)              | 8 (33%)             |

Data are expressed as the number and percent of participants using diabetes medications at baseline and month 6.

**eTable 2.** Multiple Imputation Sensitivity Analysis Results

| Variables                         | N  | Difference between groups (95% CI) |                                      |                                     |
|-----------------------------------|----|------------------------------------|--------------------------------------|-------------------------------------|
|                                   |    | TRE vs CR                          | TRE vs CON                           | CR vs CON                           |
| <b>Body weight</b>                |    |                                    |                                      |                                     |
| Weight change (%)                 | 75 | -1.476 (-3.854 to 0.902) p=0.217   | -3.241 (-5.609 to -0.872)<br>p=0.008 | -1.764 (-3.695 to 0.166)<br>p=0.072 |
| Body weight (kg)                  | 75 | -1.555 (-4.161 to 1.052) p=0.235   | -3.149 (-5.806 to -0.492)<br>p=0.021 | -1.594 (-3.736 to 0.548)<br>p=0.141 |
| <b>Glycemic control</b>           |    |                                    |                                      |                                     |
| HbA1c (%)                         | 72 | 0.12 (-0.57 to 0.81)               | -0.84 (-1.56 to -0.13)               | -0.97 (-1.66 to -0.27)              |
| Time in range (%)                 | 67 | -7.67 (-19.06 to 3.72)             | 10.13 (-8.85 to 29.10)               | 17.80 (-0.69 to 36.28)              |
| Mean glucose (mg/dl)              | 67 | 8.57 (-11.83 to 28.97)             | -32.18 (-72.30 to 7.94)              | -40.75 (-78.69 to -2.82)            |
| <b>Medication effect score</b>    |    |                                    |                                      |                                     |
| Oral hypoglycemic agents          | 75 | -0.18 (-0.40 to 0.05)              | -0.16 (-0.39 to 0.08)                | 0.02 (-0.24 to 0.27)                |
| Insulin                           | 75 | 0.00 (-0.08 to 0.08)               | -0.02 (-0.10 to 0.06)                | -0.02 (-0.05 to 0.02)               |
| <b>Body composition</b>           |    |                                    |                                      |                                     |
| Fat mass (kg)                     | 71 | -0.51 (-2.40 to 1.38)              | -2.28 (-4.16 to -0.40)               | -1.77 (-3.47 to -0.07)              |
| Lean mass (kg)                    | 71 | -1.77 (-4.90 to 1.37)              | -1.78 (-4.96 to 1.39)                | -0.02 (-1.22 to 1.18)               |
| Visceral fat mass (kg)            | 70 | 0.04 (-0.19 to 0.27)               | -0.07 (-0.29 to 0.15)                | -0.11 (-0.30 to 0.07)               |
| Waist circumference (cm)          | 74 | 0.03 (-2.55 to 2.61)               | -3.11 (-5.35 to -0.88)               | -3.14 (-5.33 to -0.95)              |
| BMI (kg/m <sup>2</sup> )          | 75 | -0.68 (-1.57 to 0.22)              | -1.22 (-2.20 to -0.25)               | -0.55 (-1.29 to 0.19)               |
| <b>Blood pressure, heart rate</b> |    |                                    |                                      |                                     |
| Systolic BP (mm Hg)               | 75 | -0.66 (-7.68 to 6.35)              | -5.34 (-13.04 to 2.36)               | -4.68 (-12.52 to 3.16)              |
| Diastolic BP (mm Hg)              | 75 | -1.04 (-5.63 to 3.55)              | -2.83 (-7.84 to 2.18)                | -1.79 (-6.13 to 2.55)               |
| Heart rate (bpm)                  | 75 | -0.64 (-6.38 to 5.09)              | -1.03 (-7.97 to 5.90)                | -0.39 (-7.26 to 6.49)               |
| <b>Plasma lipids</b>              |    |                                    |                                      |                                     |
| Total cholesterol (mg/dl)         | 71 | 5.95 (-10.57 to 22.47)             | -1.11 (-18.55 to 16.34)              | -7.06 (-26.24 to 12.13)             |
| LDL cholesterol (mg/dl)           | 71 | 2.94 (-10.93 to 16.82)             | 2.26 (-12.53 to 17.04)               | -0.69 (-16.71 to 15.34)             |
| HDL cholesterol (mg/dl)           | 71 | 2.86 (-0.91 to 6.63)               | 1.07 (-3.23 to 5.38)                 | -1.79 (-6.68 to 3.11)               |
| Triglycerides (mg/dl)             | 71 | -0.29 (-28.13 to 27.54)            | -19.91 (-50.29 to 10.46)             | -19.62 (-49.34 to 10.09)            |

Data were included for 75 participants; missing values of the outcome at non-baseline time points were imputed using multiple imputation by chained equations with predictive mean matching and 30 imputed datasets in these sensitivity analyses. Multiple imputation can incorporate observed data not otherwise accounted for in the model (e.g., using baseline insulin levels to impute missing time in euglycemic range) to estimate multiple values for each missing data point to account for sampling variability. Abbreviations: BP: Blood pressure; CON: control group, CR: Calorie restriction group, HbA1c: Glycated hemoglobin, TRE: Time restricted eating group.

**eTable 3.** Adverse Events During the Intervention

|                                        | Time restricted eating<br>(n =25) | Calorie restriction<br>(n =25) | Control<br>(n =25) |         |
|----------------------------------------|-----------------------------------|--------------------------------|--------------------|---------|
|                                        | No. (%) participants              |                                |                    | P-value |
| <b>Glycemic adverse events</b>         |                                   |                                |                    |         |
| Diabetic ketoacidosis                  | 0 (0)                             | 0 (0)                          | 0 (0)              | 1.000   |
| Hypoglycemia                           | 10 (40)                           | 11 (44)                        | 14 (56)            | 0.498   |
| Hyperglycemia                          | 21 (84)                           | 20 (80)                        | 22 (88)            | 0.743   |
| <b>Gastrointestinal adverse events</b> |                                   |                                |                    |         |
| Nausea                                 | 12 (48)                           | 14 (56)                        | 10 (40)            | 0.527   |
| Vomiting                               | 4 (16)                            | 4 (16)                         | 2 (8)              | 0.630   |
| Diarrhea                               | 13 (52)                           | 17 (68)                        | 18 (72)            | 0.297   |
| Constipation                           | 17 (68)                           | 20 (80)                        | 15 (60)            | 0.304   |
| <b>Other adverse events</b>            |                                   |                                |                    |         |
| Headache                               | 15 (60)                           | 18 (72)                        | 16 (64)            | 0.662   |
| Dizziness                              | 13 (52)                           | 16 (64)                        | 12 (48)            | 0.497   |
| Fatigue                                | 17 (68)                           | 21 (84)                        | 20 (80)            | 0.372   |
| Irritability                           | 15 (60)                           | 13 (52)                        | 12 (48)            | 0.687   |
| Halitosis                              | 7 (28)                            | 7 (28)                         | 8 (32)             | 1.000   |
| Dry mouth                              | 15 (60)                           | 14 (56)                        | 18 (72)            | 0.477   |

Data are expressed as the number of participants with at least one adverse event that occurred over the course of the 6-month trial. Participants may have experienced an adverse event at more than one time point.

**eFigure 1.** Experimental Design

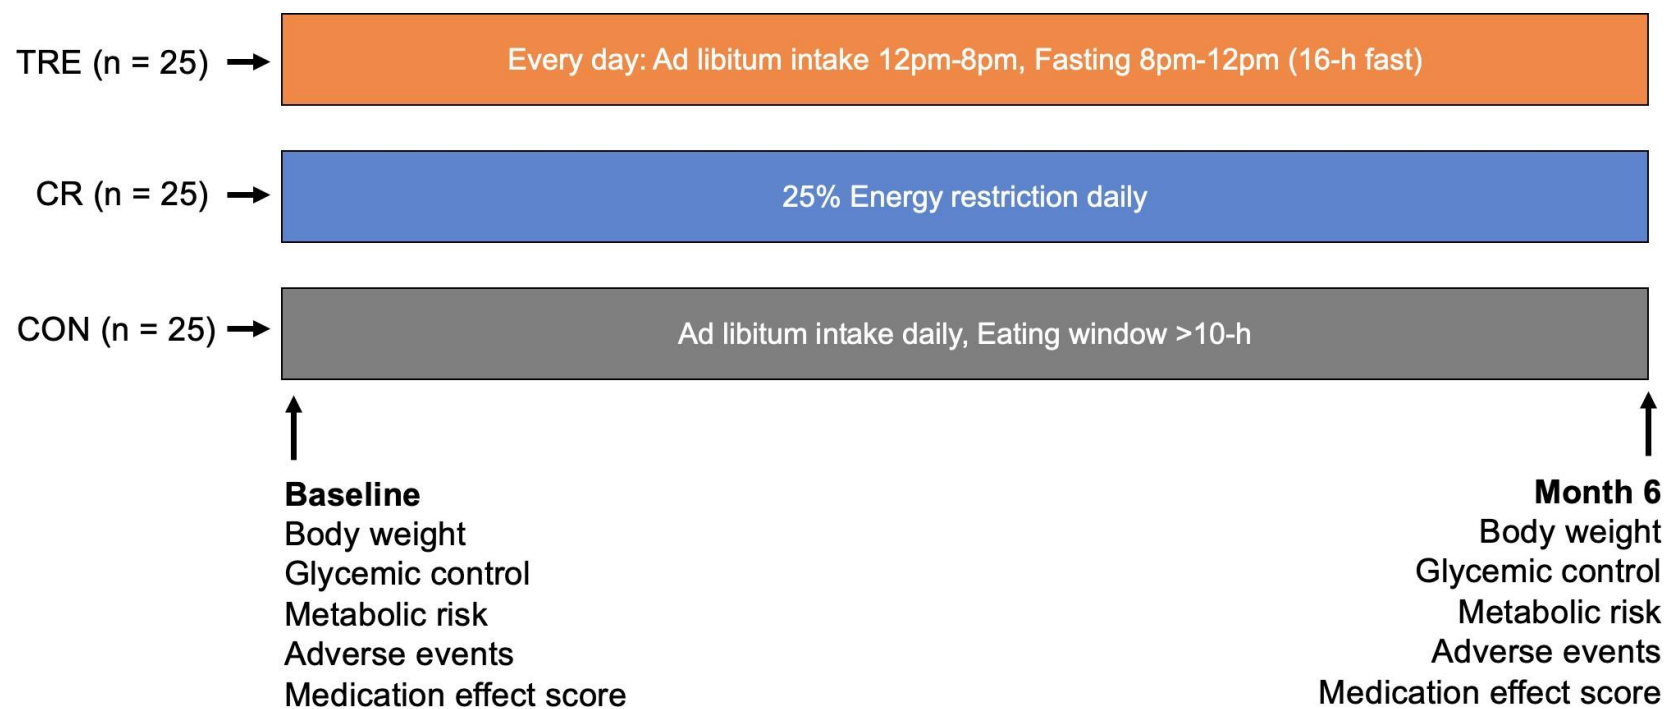

Abbreviations: CON: control group, CR: Calorie restriction group, TRE: Time restricted eating group.

**eFigure 2.** Adherence to the Diet Interventions

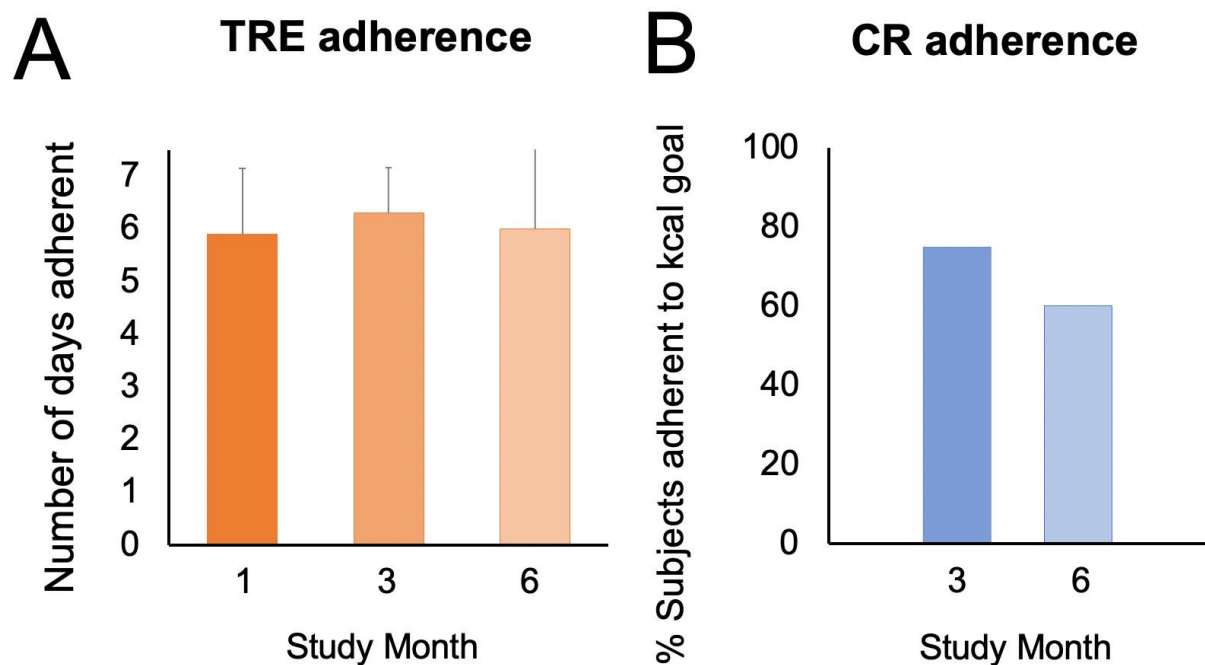

**A.** Adherence to the time restricted eating (TRE) intervention. Data are expressed as mean (SD) days per week that participants reported being adherent with the 12:00 pm to 8:00 pm eating window; only observed values included. A total of 21/25 TRE participants returned all adherence logs. **B.** Adherence to the daily calorie restriction (CR) intervention. Data are expressed as the proportion of participants whose actual energy intake, determined via food recalls, was within 200 kcal of their prescribed daily energy goal; only observed values included. A total of 20/25 CR participants returned all food records. Abbreviations: CR: Calorie restriction group, TRE: Time restricted eating group.

**eFigure 3.** Difficulty in Adhering to the Time-Restricted Eating vs Calorie Restriction Intervention

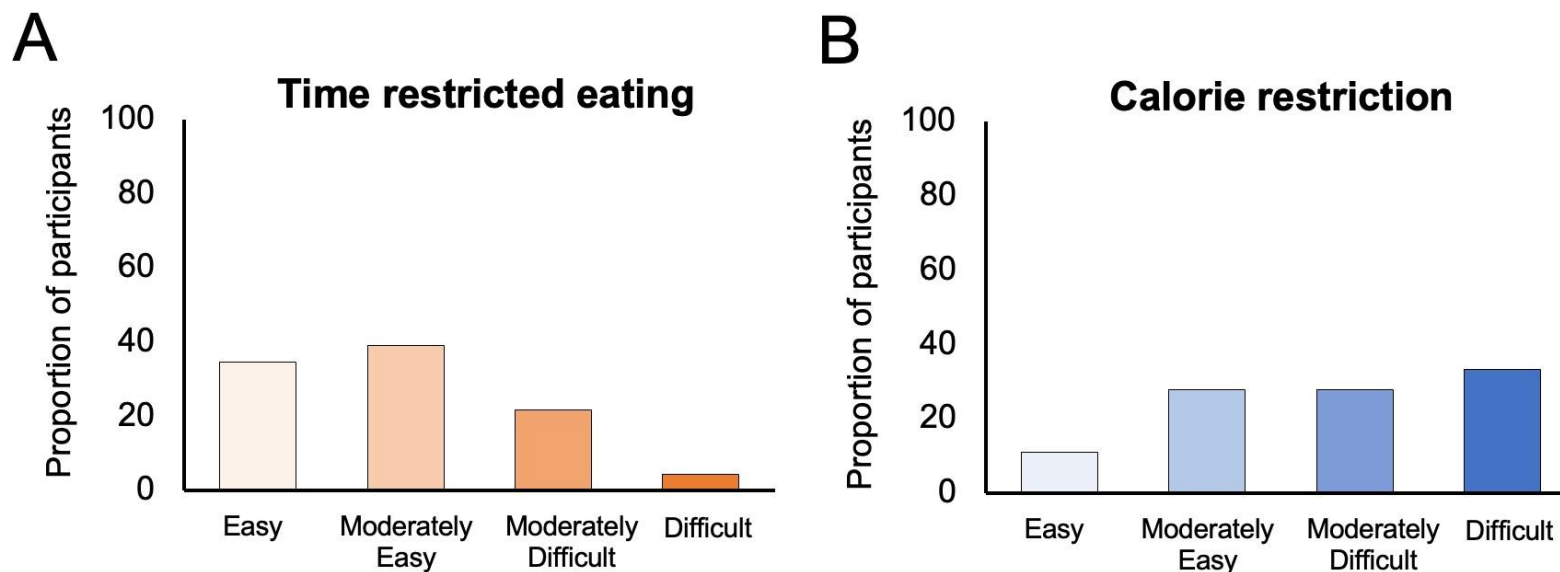

**A.** Data are expressed as the proportion of time restricted eating participants who reported finding their assigned diet intervention easy, moderately easy, moderately difficult, or difficult to adhere to. A total of 23/25 TRE participants returned the survey. **B.** Data are expressed as the proportion of calorie restriction participants who reported finding their assigned diet intervention easy, moderately easy, moderately difficult, or difficult to adhere to. A total of 19/25 CR participants returned the



survey. TRE participants reported finding their diet intervention easier to adhere to, when compared CR participants.
