# Supplementary material for: Effect of Time-Restricted Eating on Weight Loss in Adults With Type 2 Diabetes: A Randomized Clinical Trial
Source: PubMed Central journal article supplement — JAMA Netw Open. 2023 Oct 27;6(10):e2339337. doi: 10.1001/jamanetworkopen.2023.39337 (PMC10611992; doi:10.1001/jamanetworkopen.2023.39337), 2023-10-27
Supplement: jamanetwopen-e2339337-s003.pdf [file jamanetwopen-e2339337-s003.pdf]

## Data Sharing Statement

Pavlou. Effect of Time-Restricted Eating on Weight Loss in Adults With Type 2 Diabetes. *JAMA Netw Open*. Published October 27, 2023. doi:10.1001/jamanetworkopen.2023.39337

### Data

**Data available:** No

### Additional Information

**Explanation for why data not available:** The subjects did not provide consent to share de-identified data at the time they were consented to participate in the study. As such, the institutional review board will not permit the sharing of de-identified data for this study.
